# Supplementary material for: Heat Stress in Pinus halepensis Somatic Embryogenesis Induction: Effect in DNA Methylation and Differential Expression of Stress-Related Genes
Source: MDPI journal article supplement (doi:10.3390/plants10112333), 2021-10-29
Supplement: s1 [file s1]

## Article

# Heat Stress in *Pinus halepensis* Somatic Embryogenesis Induction: Effect in DNA Methylation and Differential Expression of Stress-Related Genes

Cátia Pereira <sup>1,2</sup>, Ander Castander-Olarieta <sup>2</sup>, Ester Sales <sup>3</sup>, Itziar A. Montalbán <sup>2</sup>, Jorge Canhoto <sup>1,\*</sup> and Paloma Moncaleán <sup>2,\*</sup>

## Supplementary Materials

**Table S1.** One-way analysis of variance for methylation rates (%) detected in *P. halepensis* embryonal masses (EMs) and needles from *in vitro* somatic plants induced under different temperature treatments (23 °C, 9 weeks; 40 °C, 4 h; 50 °C, 30 min; 60 °C, 5 min).

| Kruskal-Wallis | df | X <sup>2</sup> test | p value |
|----------------|----|---------------------|---------|
| EMs            | 3  | 5.960               | n.s.    |
| Needles        | 3  | 5.359               | n.s.    |

<sup>1</sup>not statistically significant.

**Table S2.** Total methylation rates (%) detected in *P. halepensis* proliferating embryonal masses (EMs) and needles from *in vitro* somatic plants induced under different temperature treatments (23 °C (control); 40 °C, 4 h; 50 °C, 30 min; 60 °C, 5 min). Data are presented as mean values ± SE and significant differences at  $p < 0.05$  are indicated by different letters.

| Methylation (%) | 23 °C (Control)           | 40 °C (4 h)               | 50 °C (30 min)            | 60 °C (5 min)             |
|-----------------|---------------------------|---------------------------|---------------------------|---------------------------|
| EMs             | 38.01 ± 0.72 <sup>a</sup> | 39.48 ± 1.94 <sup>a</sup> | 40.82 ± 0.84 <sup>a</sup> | 37.52 ± 0.45 <sup>a</sup> |
| Needles         | 40.00 ± 0.21 <sup>a</sup> | 40.25 ± 1.21 <sup>a</sup> | 41.47 ± 0.43 <sup>a</sup> | 41.56 ± 0.41 <sup>a</sup> |

**Table S3.** One-way analysis of variance for expression of different genes detected in *P. halepensis* embryonal masses (EMs) and needles from *in vitro* somatic plants induced under different temperature treatments (23 °C, 9 weeks; 40 °C, 4 h; 50 °C, 30 min; 60 °C, 5 min).

| Kruskal-Wallis | df | X <sup>2</sup> Test | p Value           |
|----------------|----|---------------------|-------------------|
| <b>EMs</b>     |    |                     |                   |
| P439           | 3  | 5.286               | n.s. <sup>1</sup> |
| P444           | 3  | 6.795               | n.s.              |
| DI19           | 3  | 35.23               | < 0.0001          |
| SOD            | 3  | 7.057               | n.s.              |
| <b>Needles</b> |    |                     |                   |
| P439           | 3  | 3.983               | n.s.              |
| P444           | 3  | 15.75               | 0.0013            |
| DI19           | 3  | 3.297               | n.s.              |
| SOD            | 3  | 15.42               | 0.0015            |

<sup>1</sup>not statistically significant.
